# Supplementary material for: Safety and immunogenicity of the third and fourth doses of vaccine against SARS-CoV-2 following a 2-dose regimen of inactivated whole-virion SARS-CoV-2 vaccine
Source: PubMed Central journal article supplement (PMC10643552; doi:10.1038/s41598-023-45735-7), 2023-11-13
Supplement: 41598_2023_45735_MOESM1_ESM.pdf [file 41598_2023_45735_MOESM1_ESM.pdf]

Table S1. RBD-specific antibodies, % inhibition, and seroconversion rate against WT-SARS-CoV-2

| Time point                                                | Anti-spike RBD<br>(BAU/mL) (median, IQR) |                                 | P-value | % Inhibition<br>(median, IQR)   |                                 | P-value | Seroconversion rate<br>(n, %)   |                                 | P-value |
|-----------------------------------------------------------|------------------------------------------|---------------------------------|---------|---------------------------------|---------------------------------|---------|---------------------------------|---------------------------------|---------|
|                                                           | AZD1222/<br>mRNA1273<br>(N=92)*          | BNT162b2/<br>mRNA1273<br>(N=16) |         | AZD1222/<br>mRNA1273<br>(N=92)* | BNT162b2/<br>mRNA1273<br>(N=16) |         | AZD1222/<br>mRNA1273<br>(N=92)* | BNT162b2/<br>mRNA1273<br>(N=16) |         |
| <i>Overall</i>                                            |                                          |                                 |         |                                 |                                 |         |                                 |                                 |         |
| Before the 3 <sup>rd</sup> dose                           | 48.9<br>(40.4, 59.0)                     | 49.4<br>(30.4, 80.3)            | 0.964   | 30.3<br>(17.6, 45.2)            | 23.4<br>(10.0, 47.5)            | 0.324   | 46<br>(50.0)                    | 6<br>(37.5)                     | 0.356   |
| 4-week after the 3 <sup>rd</sup> dose                     | 1,227.4<br>(1,078.8, 1,396.5)            | 2,437.4<br>(1,803.2, 3,294.8)   | <0.001  | 98.4<br>(97.8, 98.5)            | 98.6<br>(98.4, 98.7)            | 0.005   | 91<br>(98.9)                    | 16<br>(100.0)                   | 1.000   |
| Before the 4 <sup>th</sup> dose                           | 249.4<br>(212.5, 292.7)                  | 369.5<br>(267.4, 510.6)         | 0.056   | 87.5<br>(64.3, 95.7)            | 92.6<br>(81.9, 97.5)            | 0.102   | 90<br>(97.8)                    | 16<br>(100.0)                   | 1.000   |
| 4-week after the 4 <sup>th</sup> dose                     | 5,121.7<br>(4,640.1, 5,653.3)            | 3,700.4<br>(3,001.4, 4,562.2)   | 0.011   | 98.2<br>(98.0, 98.3)            | 98.2<br>(98.0, 98.4)            | 0.305   | 89<br>(98.9)                    | 16<br>(100.0)                   | 1.000   |
| <i>Duration from the 2<sup>nd</sup> dose ≤ 90 days</i>    |                                          |                                 |         |                                 |                                 |         |                                 |                                 |         |
| Before the 3 <sup>rd</sup> dose                           | 69.1<br>(57.2, 83.4)                     | 82.7<br>(52.9, 129.3)           | 0.469   | 32.7<br>(18.6, 49.9)            | 39.4<br>(23.8, 52.6)            | 0.498   | 36<br>(59.0)                    | 6<br>(60.0)                     | 0.953   |
| 4-week after the 3 <sup>rd</sup> dose                     | 1,169.3<br>(1,004.4, 1,361.3)            | 2,635.5<br>(1,619.1, 4,290.0)   | 0.002   | 98.4<br>(97.6, 98.5)            | 98.6<br>(98.4, 98.7)            | 0.004   | 61<br>(100.0)                   | 10<br>(100.0)                   | -       |
| Before the 4 <sup>th</sup> dose                           | 224.9<br>(186.5, 271.2)                  | 344.0<br>(210.9, 561.3)         | 0.090   | 86.4<br>(61.2, 95.7)            | 91.7<br>(70.3, 97.5)            | 0.209   | 60<br>(98.4)                    | 10<br>(100.0)                   | 1.000   |
| 4-week after the 4 <sup>th</sup> dose                     | 5,097.7<br>(4,496.4, 5,779.3)            | 4,311.6<br>(3,197.9, 5,813.1)   | 0.308   | 98.2<br>(97.9, 98.3)            | 98.3<br>(98.1, 98.4)            | 0.075   | 60<br>(100.0)                   | 10<br>(100.0)                   | -       |
| <i>Duration from the 2<sup>nd</sup> dose &gt; 90 days</i> |                                          |                                 |         |                                 |                                 |         |                                 |                                 |         |
| Before the 3 <sup>rd</sup> dose                           | 24.7<br>(18.1, 33.7)                     | 20.9<br>(11.0, 40.0)            | 0.653   | 21.7<br>(17.2, 35.7)            | 4.6<br>(1.1, 12.6)              | 0.002   | 10<br>(32.3)                    | 0<br>(0.0)                      | 0.162   |
| 4-week after the 3 <sup>rd</sup> dose                     | 1,350.3<br>(1,053.3, 1,731.2)            | 2,139.9<br>(1,555.9, 2,943.0)   | 0.114   | 98.4<br>(98.1, 98.5)            | 98.5<br>(98.3, 98.7)            | 0.364   | 30<br>(96.8)                    | 6<br>(100.0)                    | 1.000   |
| Before the 4 <sup>th</sup> dose                           | 305.6<br>(225.9, 413.5)                  | 416.2<br>(250.2, 692.4)         | 0.384   | 88.5<br>(70.5, 95.7)            | 94.0<br>(86.8, 97.5)            | 0.342   | 30<br>(96.8)                    | 6<br>(100.0)                    | 1.000   |
| 4-week after                                              | 5,170.1                                  | 2,868.2                         | 0.004   | 98.2                            | 98.0                            | 0.496   | 29                              | 6                               | 1.000   |

|                          |                    |                    |  |              |              |  |        |         |  |
|--------------------------|--------------------|--------------------|--|--------------|--------------|--|--------|---------|--|
| the 4 <sup>th</sup> dose | (4,371.4, 6,114.8) | (2,434.3, 3,379.4) |  | (98.1, 98.3) | (97.7, 98.4) |  | (96.7) | (100.0) |  |
|--------------------------|--------------------|--------------------|--|--------------|--------------|--|--------|---------|--|

\*N=90 for participants at 4 weeks after the fourth dose
