# Supplementary material for: Safety and immunogenicity of the third and fourth doses of vaccine against SARS-CoV-2 following a 2-dose regimen of inactivated whole-virion SARS-CoV-2 vaccine
Source: PubMed Central journal article supplement (PMC10643552; doi:10.1038/s41598-023-45735-7), 2023-11-13
Supplement: 41598_2023_45735_MOESM2_ESM.pdf [file 41598_2023_45735_MOESM2_ESM.pdf]

Table S2. Percent inhibition and seroconversion rate against SARS-CoV-2 variant of concerns

| Time point                            | % Inhibition<br>(median, IQR)   |                                 | P-value | Seroconversion rate<br>(n, %)   |                                 | P-value |
|---------------------------------------|---------------------------------|---------------------------------|---------|---------------------------------|---------------------------------|---------|
|                                       | AZD1222/<br>mRNA1273<br>(N=92)* | BNT162b2/<br>mRNA1273<br>(N=16) |         | AZD1222/<br>mRNA1273<br>(N=92)* | BNT162b2/<br>mRNA1273<br>(N=16) |         |
| B.1.1.7 [Alpha]                       |                                 |                                 |         |                                 |                                 |         |
| 4-week after the 3 <sup>rd</sup> dose | 97.0 (94.1, 98.1)               | 96.2 (95.5, 96.7)               | 0.097   | 90 (97.8)                       | 16 (100.0)                      | 1.000   |
| Before the 4 <sup>th</sup> dose       | 84.9 (65.7, 93.3)               | 82.7 (68.0, 96.0)               | 0.551   | 87 (94.6)                       | 16 (100.0)                      | 1.000   |
| 4-week after the 4 <sup>th</sup> dose | 98.5 (98.2, 98.6)               | 98.4 (98.1, 98.5)               | 0.136   | 89 (98.9)                       | 16 (100.0)                      | 1.000   |
| B.1.351 [Beta]                        |                                 |                                 |         |                                 |                                 |         |
| 4-week after the 3 <sup>rd</sup> dose | 91.8 (81.9, 95.8)               | 93.3 (91.6, 94.3)               | 0.762   | 88 (95.7)                       | 16 (100.0)                      | 1.000   |
| Before the 4 <sup>th</sup> dose       | 68.3 (41.6, 78.6)               | 74.9 (48.0, 89.9)               | 0.169   | 80 (87.0)                       | 16 (100.0)                      | 0.207   |
| 4-week after the 4 <sup>th</sup> dose | 98.2 (97.7, 98.4)               | 97.6 (97.0, 97.9)               | 0.002   | 86 (95.6)                       | 16 (100.0)                      | 1.000   |
| B.1.617.2 [Delta]                     |                                 |                                 |         |                                 |                                 |         |
| 4-week after the 3 <sup>rd</sup> dose | 97.9 (96.8, 98.3)               | 93.5 (91.7, 93.8)               | <0.001  | 90 (97.8)                       | 15 (93.8)                       | 0.385   |
| Before the 4 <sup>th</sup> dose       | 84.4 (61.8, 93.3)               | 74.1 (55.9, 92.7)               | 0.716   | 90 (97.8)                       | 16 (100.0)                      | 1.000   |
| 4-week after the 4 <sup>th</sup> dose | 98.5 (98.2, 98.6)               | 98.1 (97.8, 98.5)               | 0.085   | 86 (95.6)                       | 16 (100.0)                      | 1.000   |
| B.1.1.529 [Omicron]                   |                                 |                                 |         |                                 |                                 |         |
| 4-week after the 3 <sup>rd</sup> dose | 62.9 (33.6, 79.6)               | 80.5 (62.7, 87.7)               | 0.046   | 70 (76.1)                       | 13 (81.3)                       | 0.759   |
| Before the 4 <sup>th</sup> dose       | 12.7 (3.5, 28.8)                | 8.5 (5.6, 25.3)                 | 0.795   | 20 (21.7)                       | 3 (18.8)                        | 1.000   |
| 4-week after the 4 <sup>th</sup> dose | 92.9 (77.6, 96.3)               | 81.2 (72.9, 87.2)               | 0.035   | 84 (93.3)                       | 15 (93.8)                       | 1.000   |

\*N=90 for participants at 4 weeks after the fourth dose
