# Supplementary material for: Safety and immunogenicity of the third and fourth doses of vaccine against SARS-CoV-2 following a 2-dose regimen of inactivated whole-virion SARS-CoV-2 vaccine
Source: PubMed Central journal article supplement (PMC10643552; doi:10.1038/s41598-023-45735-7), 2023-11-13
Supplement: 41598_2023_45735_MOESM3_ESM.pdf [file 41598_2023_45735_MOESM3_ESM.pdf]

Table S3. RBD-specific antibodies, % inhibition, and seroconversion rate against WT-SARS-CoV-2

| Time point                                                | Anti-spike RBD<br>(BAU/mL) (median, IQR) |                                 | P-value | % Inhibition<br>(median, IQR)    |                                 | P-value | Seroconversion rate<br>(n, %)    |                                 | P-value |
|-----------------------------------------------------------|------------------------------------------|---------------------------------|---------|----------------------------------|---------------------------------|---------|----------------------------------|---------------------------------|---------|
|                                                           | BNT162b2/<br>BNT162b2 (N=76)*            | BNT162b2/<br>mRNA1273<br>(N=16) |         | BNT162b2/<br>BNT162b2<br>(N=76)* | BNT162b2/<br>mRNA1273<br>(N=16) |         | BNT162b2/<br>BNT162b2<br>(N=76)* | BNT162b2/<br>mRNA1273<br>(N=16) |         |
| <i>Overall</i>                                            |                                          |                                 |         |                                  |                                 |         |                                  |                                 |         |
| Before the 3 <sup>rd</sup> dose                           | 43.5<br>(36.1, 52.3)                     | 49.4<br>(30.4, 80.3)            | 0.557   | 20.8<br>(10.7, 31.0)             | 23.4<br>(10.0, 47.5)            | 0.647   | 21<br>(27.6)                     | 6<br>(37.5)                     | 0.547   |
| 4-week after the 3 <sup>rd</sup> dose                     | 2,973.1<br>(2,596.3, 3,404.5)            | 2,437.4<br>(1,803.2, 3,294.8)   | 0.223   | 98.5<br>(98.4, 98.6)             | 98.6<br>(98.4, 98.7)            | 0.642   | 76<br>(100.0)                    | 16<br>(100.0)                   | -       |
| Before the 4 <sup>th</sup> dose                           | 364.6<br>(304.8, 436.2)                  | 365.5<br>(312.7, 427.2)         | 0.950   | 94.3<br>(85.1, 98.1)             | 92.6<br>(81.9, 97.5)            | 0.487   | 75<br>(98.7)                     | 16<br>(100.0)                   | 1.000   |
| 4-week after the 4 <sup>th</sup> dose                     | 2,679.3<br>(2,362.5, 3,038.7)            | 3,700.4<br>(3,001.4, 4,562.2)   | 0.028   | 98.2<br>(97.9, 98.3)             | 98.2<br>(98.0, 98.4)            | 0.514   | 75<br>(100.0)                    | 16<br>(100.0)                   | -       |
| <i>Duration from the 2<sup>nd</sup> dose ≤ 90 days</i>    |                                          |                                 |         |                                  |                                 |         |                                  |                                 |         |
| Before the 3 <sup>rd</sup> dose                           | 63.8<br>(54.8, 74.4)                     | 82.7<br>(52.9, 129.3)           | 0.174   | 26.8<br>(17.7, 33.7)             | 39.4<br>(23.8, 52.6)            | 0.093   | 18<br>(38.3)                     | 6<br>(60.0)                     | 0.294   |
| 4-week after the 3 <sup>rd</sup> dose                     | 2,567.6<br>(2,181.1, 3,022.5)            | 2,635.5<br>(1,619.1, 4,290.0)   | 0.897   | 98.5<br>(98.4, 98.6)             | 98.6<br>(98.4, 98.7)            | 0.274   | 47<br>(100.0)                    | 10<br>(100.0)                   | -       |
| Before the 4 <sup>th</sup> dose                           | 291.9<br>(243.2, 350.4)                  | 344.0<br>(210.9, 561.3)         | 0.459   | 91.9<br>(83.0, 96.6)             | 91.7<br>(70.3, 97.5)            | 1.000   | 46<br>(97.9)                     | 10<br>(100.0)                   | 1.000   |
| 4-week after the 4 <sup>th</sup> dose                     | 2,617.9<br>(2,197.7, 3,118.5)            | 4,311.6<br>(3,197.9, 5,813.1)   | 0.015   | 98.1<br>(97.9, 98.3)             | 98.3<br>(98.1, 98.4)            | 0.145   | 47<br>(100.0)                    | 10<br>(100.0)                   | -       |
| <i>Duration from the 2<sup>nd</sup> dose &gt; 90 days</i> |                                          |                                 |         |                                  |                                 |         |                                  |                                 |         |
| Before the 3 <sup>rd</sup> dose                           | 23.4<br>(17.1, 31.8)                     | 20.9<br>(11.0, 40.0)            | 0.758   | 12.7<br>(3.0, 19.3)              | 4.6<br>(1.1, 12.6)              | 0.201   | 3<br>(10.3)                      | 0<br>(0.0)                      | 1.000   |
| 4-week after the 3 <sup>rd</sup> dose                     | 3,770.6<br>(3,020.4, 4,707.0)            | 2,139.9<br>(1,555.9, 2,943.0)   | 0.028   | 98.6<br>(98.5, 98.6)             | 98.5<br>(98.3, 98.7)            | 0.538   | 29<br>(100.0)                    | 6<br>(100.0)                    | -       |
| Before the 4 <sup>th</sup> dose                           | 523.0<br>(372.5, 734.3)                  | 416.2<br>(250.2, 692.4)         | 0.550   | 97.8<br>(92.1, 98.2)             | 94.0<br>(86.8, 97.5)            | 0.168   | 29<br>(100.0)                    | 6<br>(100.0)                    | -       |
| 4-week after the 4 <sup>th</sup> dose                     | 2,785.7<br>(2,329.8, 3,330.7)            | 2,868.2<br>(2,434.3, 3,379.4)   | 0.880   | 98.2<br>(98.0, 98.3)             | 98.0<br>(97.7, 98.4)            | 0.442   | 28<br>(100.0)                    | 6<br>(100.0)                    | -       |

\*N=75 for participants at 4 weeks after the fourth dose
