# Supplementary material for: Safety and immunogenicity of the third and fourth doses of vaccine against SARS-CoV-2 following a 2-dose regimen of inactivated whole-virion SARS-CoV-2 vaccine
Source: PubMed Central journal article supplement (PMC10643552; doi:10.1038/s41598-023-45735-7), 2023-11-13
Supplement: 41598_2023_45735_MOESM4_ESM.pdf [file 41598_2023_45735_MOESM4_ESM.pdf]

Table S4. Percent Inhibition and seroconversion rate against SARS-CoV-2 variant of concerns

| Time point                            | % Inhibition<br>(median, IQR)    |                                 | P-value | Seroconversion rate<br>(n, %)    |                                 | P-value |
|---------------------------------------|----------------------------------|---------------------------------|---------|----------------------------------|---------------------------------|---------|
|                                       | BNT162b2/<br>BNT162b2<br>(N=76)* | BNT162b2/<br>mRNA1273<br>(N=16) |         | BNT162b2/<br>BNT162b2<br>(N=76)* | BNT162b2/<br>mRNA1273<br>(N=16) |         |
| B.1.1.7 [Alpha]                       |                                  |                                 |         |                                  |                                 |         |
| 4-week after the 3 <sup>rd</sup> dose | 96.5 (96.2, 96.7)                | 96.2 (95.5, 96.7)               | 0.117   | 75 (98.7)                        | 16 (100.0)                      | 1.000   |
| Before the 4 <sup>th</sup> dose       | 86.6 (71.6, 97.2)                | 82.7 (68.0, 96.0)               | 0.639   | 73 (96.1)                        | 16 (100.0)                      | 1.000   |
| 4-week after the 4 <sup>th</sup> dose | 98.3 (98.1, 98.5)                | 98.4 (98.1, 98.5)               | 0.743   | 75 (100.0)                       | 16 (100.0)                      | -       |
| B.1.351 [Beta]                        |                                  |                                 |         |                                  |                                 |         |
| 4-week after the 3 <sup>rd</sup> dose | 93.8 (92.6, 94.5)                | 93.3 (91.6, 94.3)               | 0.356   | 75 (98.7)                        | 16 (100.0)                      | 1.000   |
| Before the 4 <sup>th</sup> dose       | 74.4 (58.5, 90.7)                | 74.9 (48.0, 89.9)               | 0.753   | 73 (96.1)                        | 16 (100.0)                      | 1.000   |
| 4-week after the 4 <sup>th</sup> dose | 97.6 (96.5, 98.0)                | 97.6 (97.0, 97.9)               | 0.958   | 75 (100.0)                       | 16 (100.0)                      | -       |
| B.1.617.2 [Delta]                     |                                  |                                 |         |                                  |                                 |         |
| 4-week after the 3 <sup>rd</sup> dose | 93.8 (92.8, 94.3)                | 93.5 (91.7, 93.8)               | 0.089   | 75 (98.7)                        | 15 (93.8)                       | 0.319   |
| Before the 4 <sup>th</sup> dose       | 81.6 (63.0, 96.3)                | 74.1 (55.9, 92.7)               | 0.365   | 73 (96.1)                        | 16 (100.0)                      | 1.000   |
| 4-week after the 4 <sup>th</sup> dose | 98.0 (97.7, 98.4)                | 98.1 (97.8, 98.5)               | 0.528   | 75 (100.0)                       | 16 (100.0)                      | -       |
| B.1.1.529 [Omicron]                   |                                  |                                 |         |                                  |                                 |         |
| 4-week after the 3 <sup>rd</sup> dose | 81.7 (67.3, 91.9)                | 80.5 (62.7, 87.7)               | 0.500   | 70 (92.1)                        | 13 (81.3)                       | 0.187   |
| Before the 4 <sup>th</sup> dose       | 17.6 (7.8, 39.1)                 | 8.5 (5.6, 25.3)                 | 0.161   | 25 (32.9)                        | 3 (18.8)                        | 0.374   |
| 4-week after the 4 <sup>th</sup> dose | 85.3 (72.7, 92.5)                | 81.2 (72.9, 87.2)               | 0.370   | 69 (92.0)                        | 15 (93.8)                       | 1.000   |

\*N=90 for participants at 4 weeks after the fourth dose
